# Supplementary material for: Evaluation of convective cloud microphysics in numerical weather prediction models with dual-wavelength polarimetric radar observations: methods and examples
Source: Copernicus journal article supplement (doi:10.5194/amt-15-1033-2022), 2022-03-01
Supplement: Supplementary file [file amt-15-1033-2022-supplement-title-page.pdf › amt-15-1033-2022-supplement-title-page.pdf]

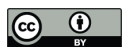

*Supplement of*

## **Evaluation of convective cloud microphysics in numerical weather prediction models with dual-wavelength polarimetric radar observations: methods and examples**

**Gregor Köcher et al.**

*Correspondence to:* Gregor Köcher ([gregor.koecher@physik.uni-muenchen.de](mailto:gregor.koecher@physik.uni-muenchen.de))

- [amt-15-1033-2022-supplement-title-page.pdf](#)
- [namelist.wrf](#)

The copyright of individual parts of the supplement might differ from the article licence.
